# Supplementary material
Source: PubMed Central journal article supplement (PMC6445762)

# normalized QC samples

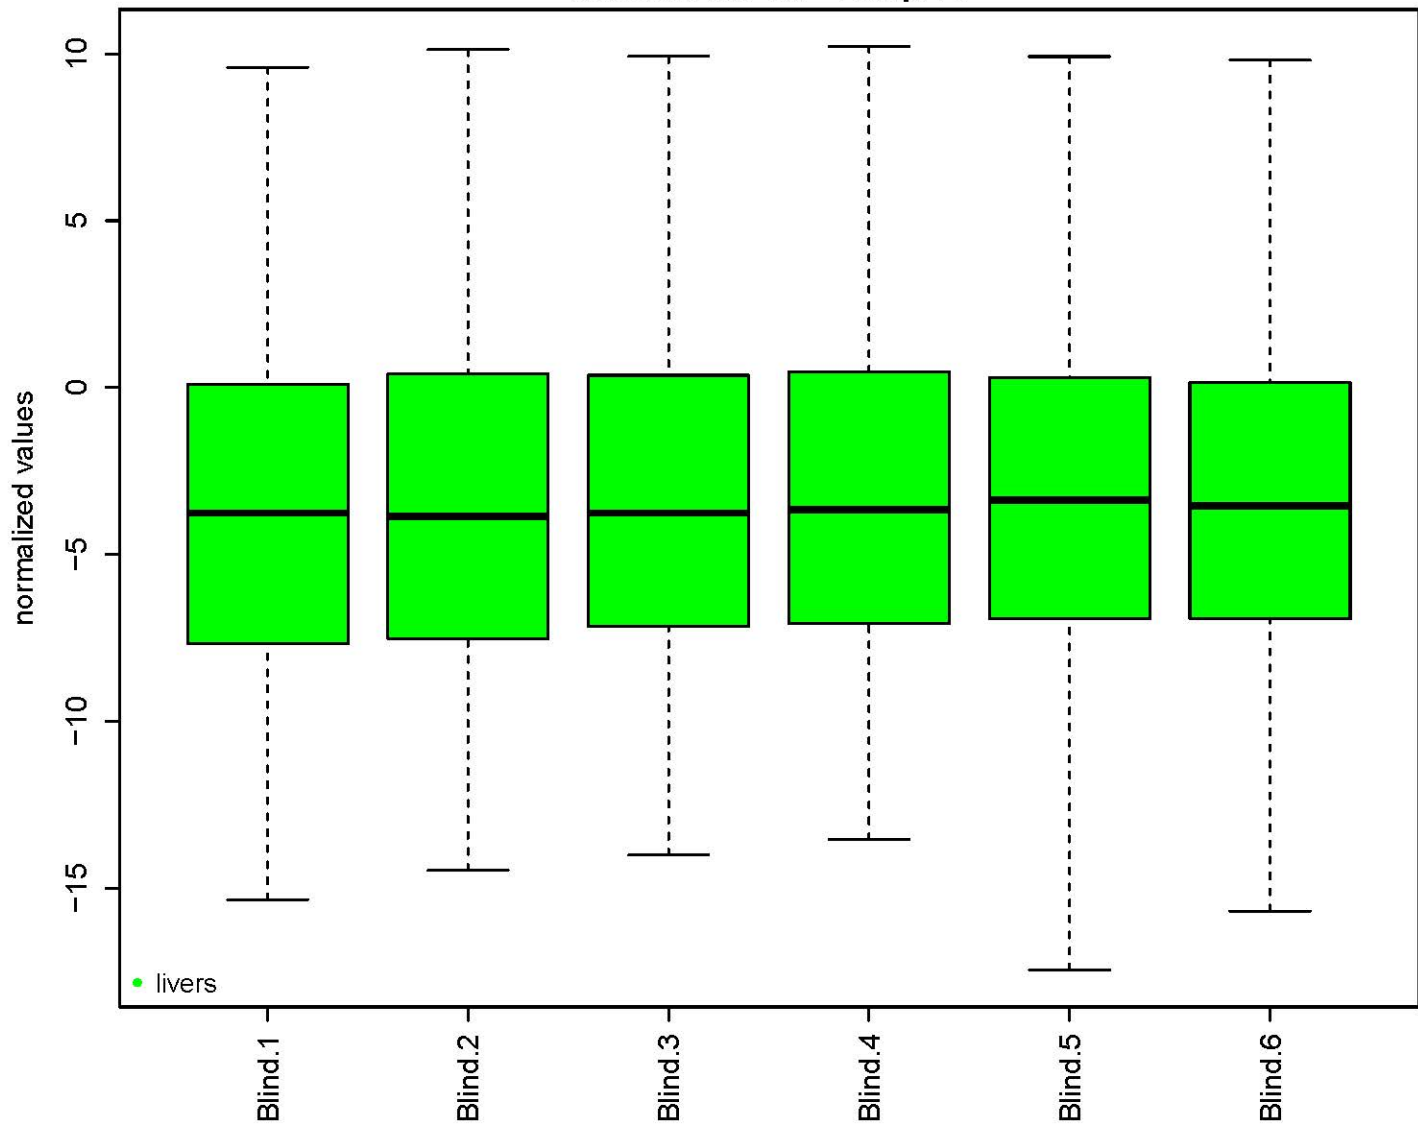

Supplement: NIHMS1520874-supplement-3.pdf [file NIHMS1520874-supplement-3.pdf]

# PC1PC2.discoverysample.pca

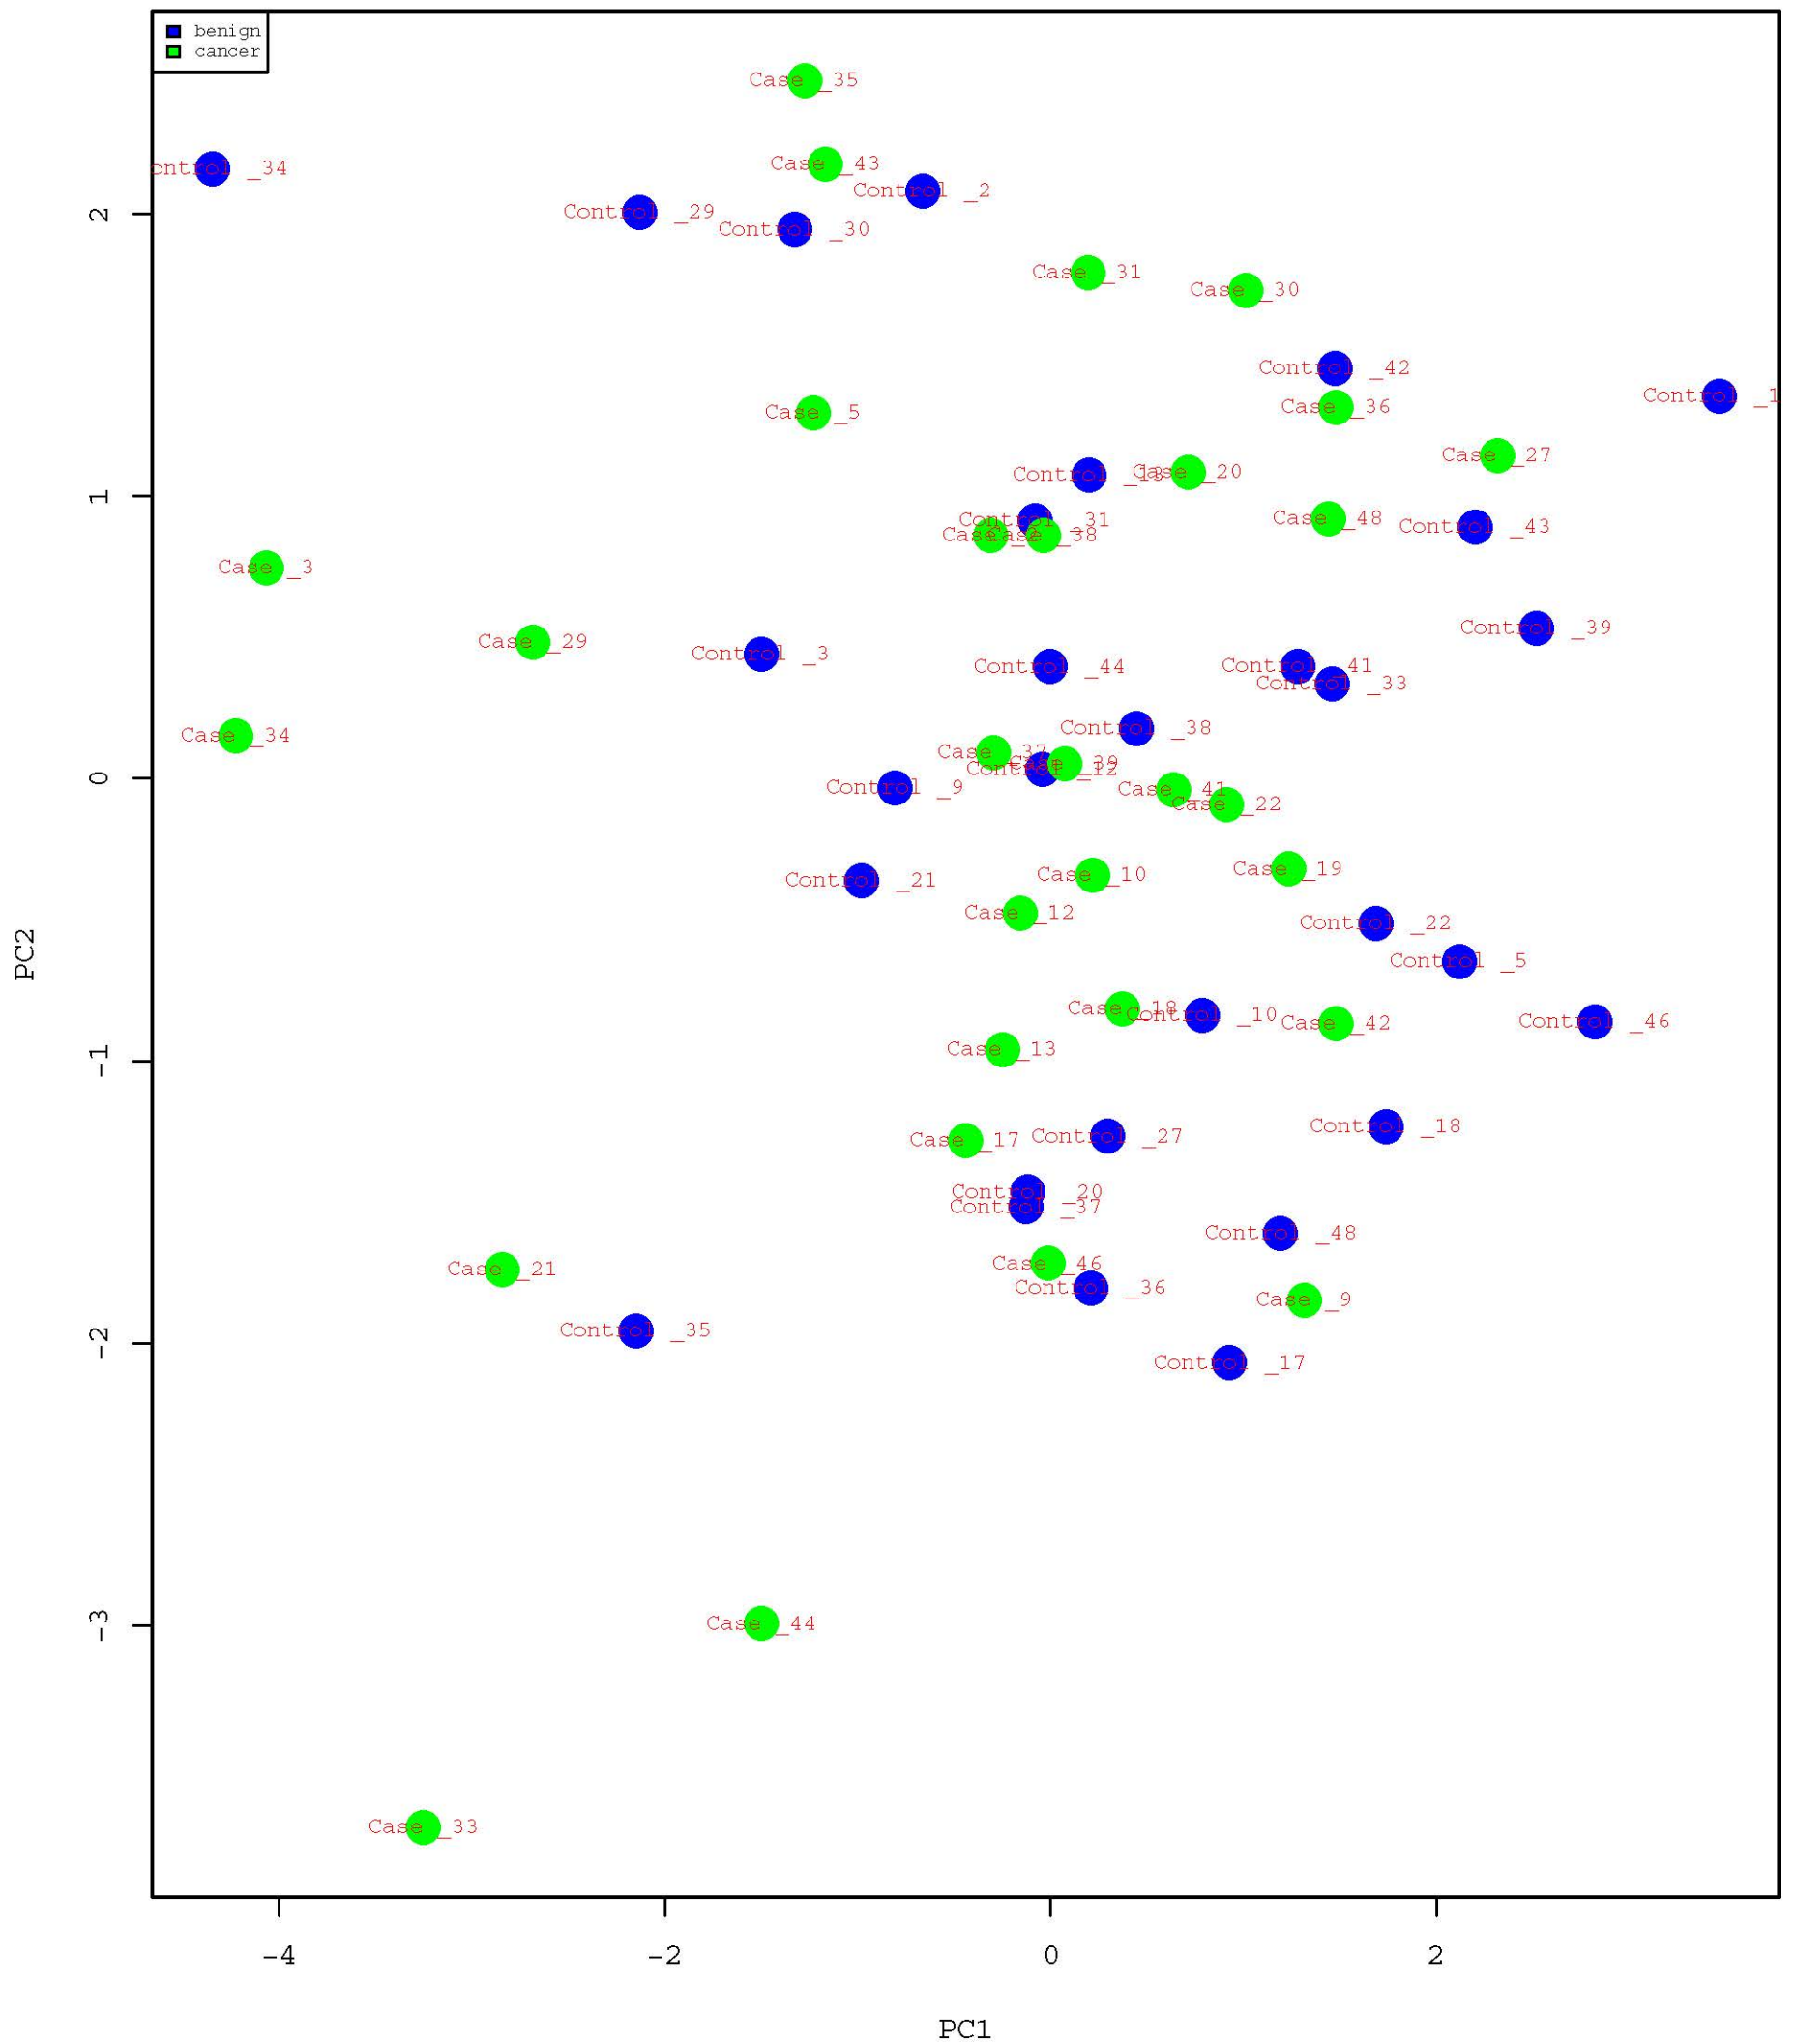

Supplement: NIHMS1520874-supplement-4.pdf [file NIHMS1520874-supplement-4.pdf]

# PC1PC2.validationsample.pca

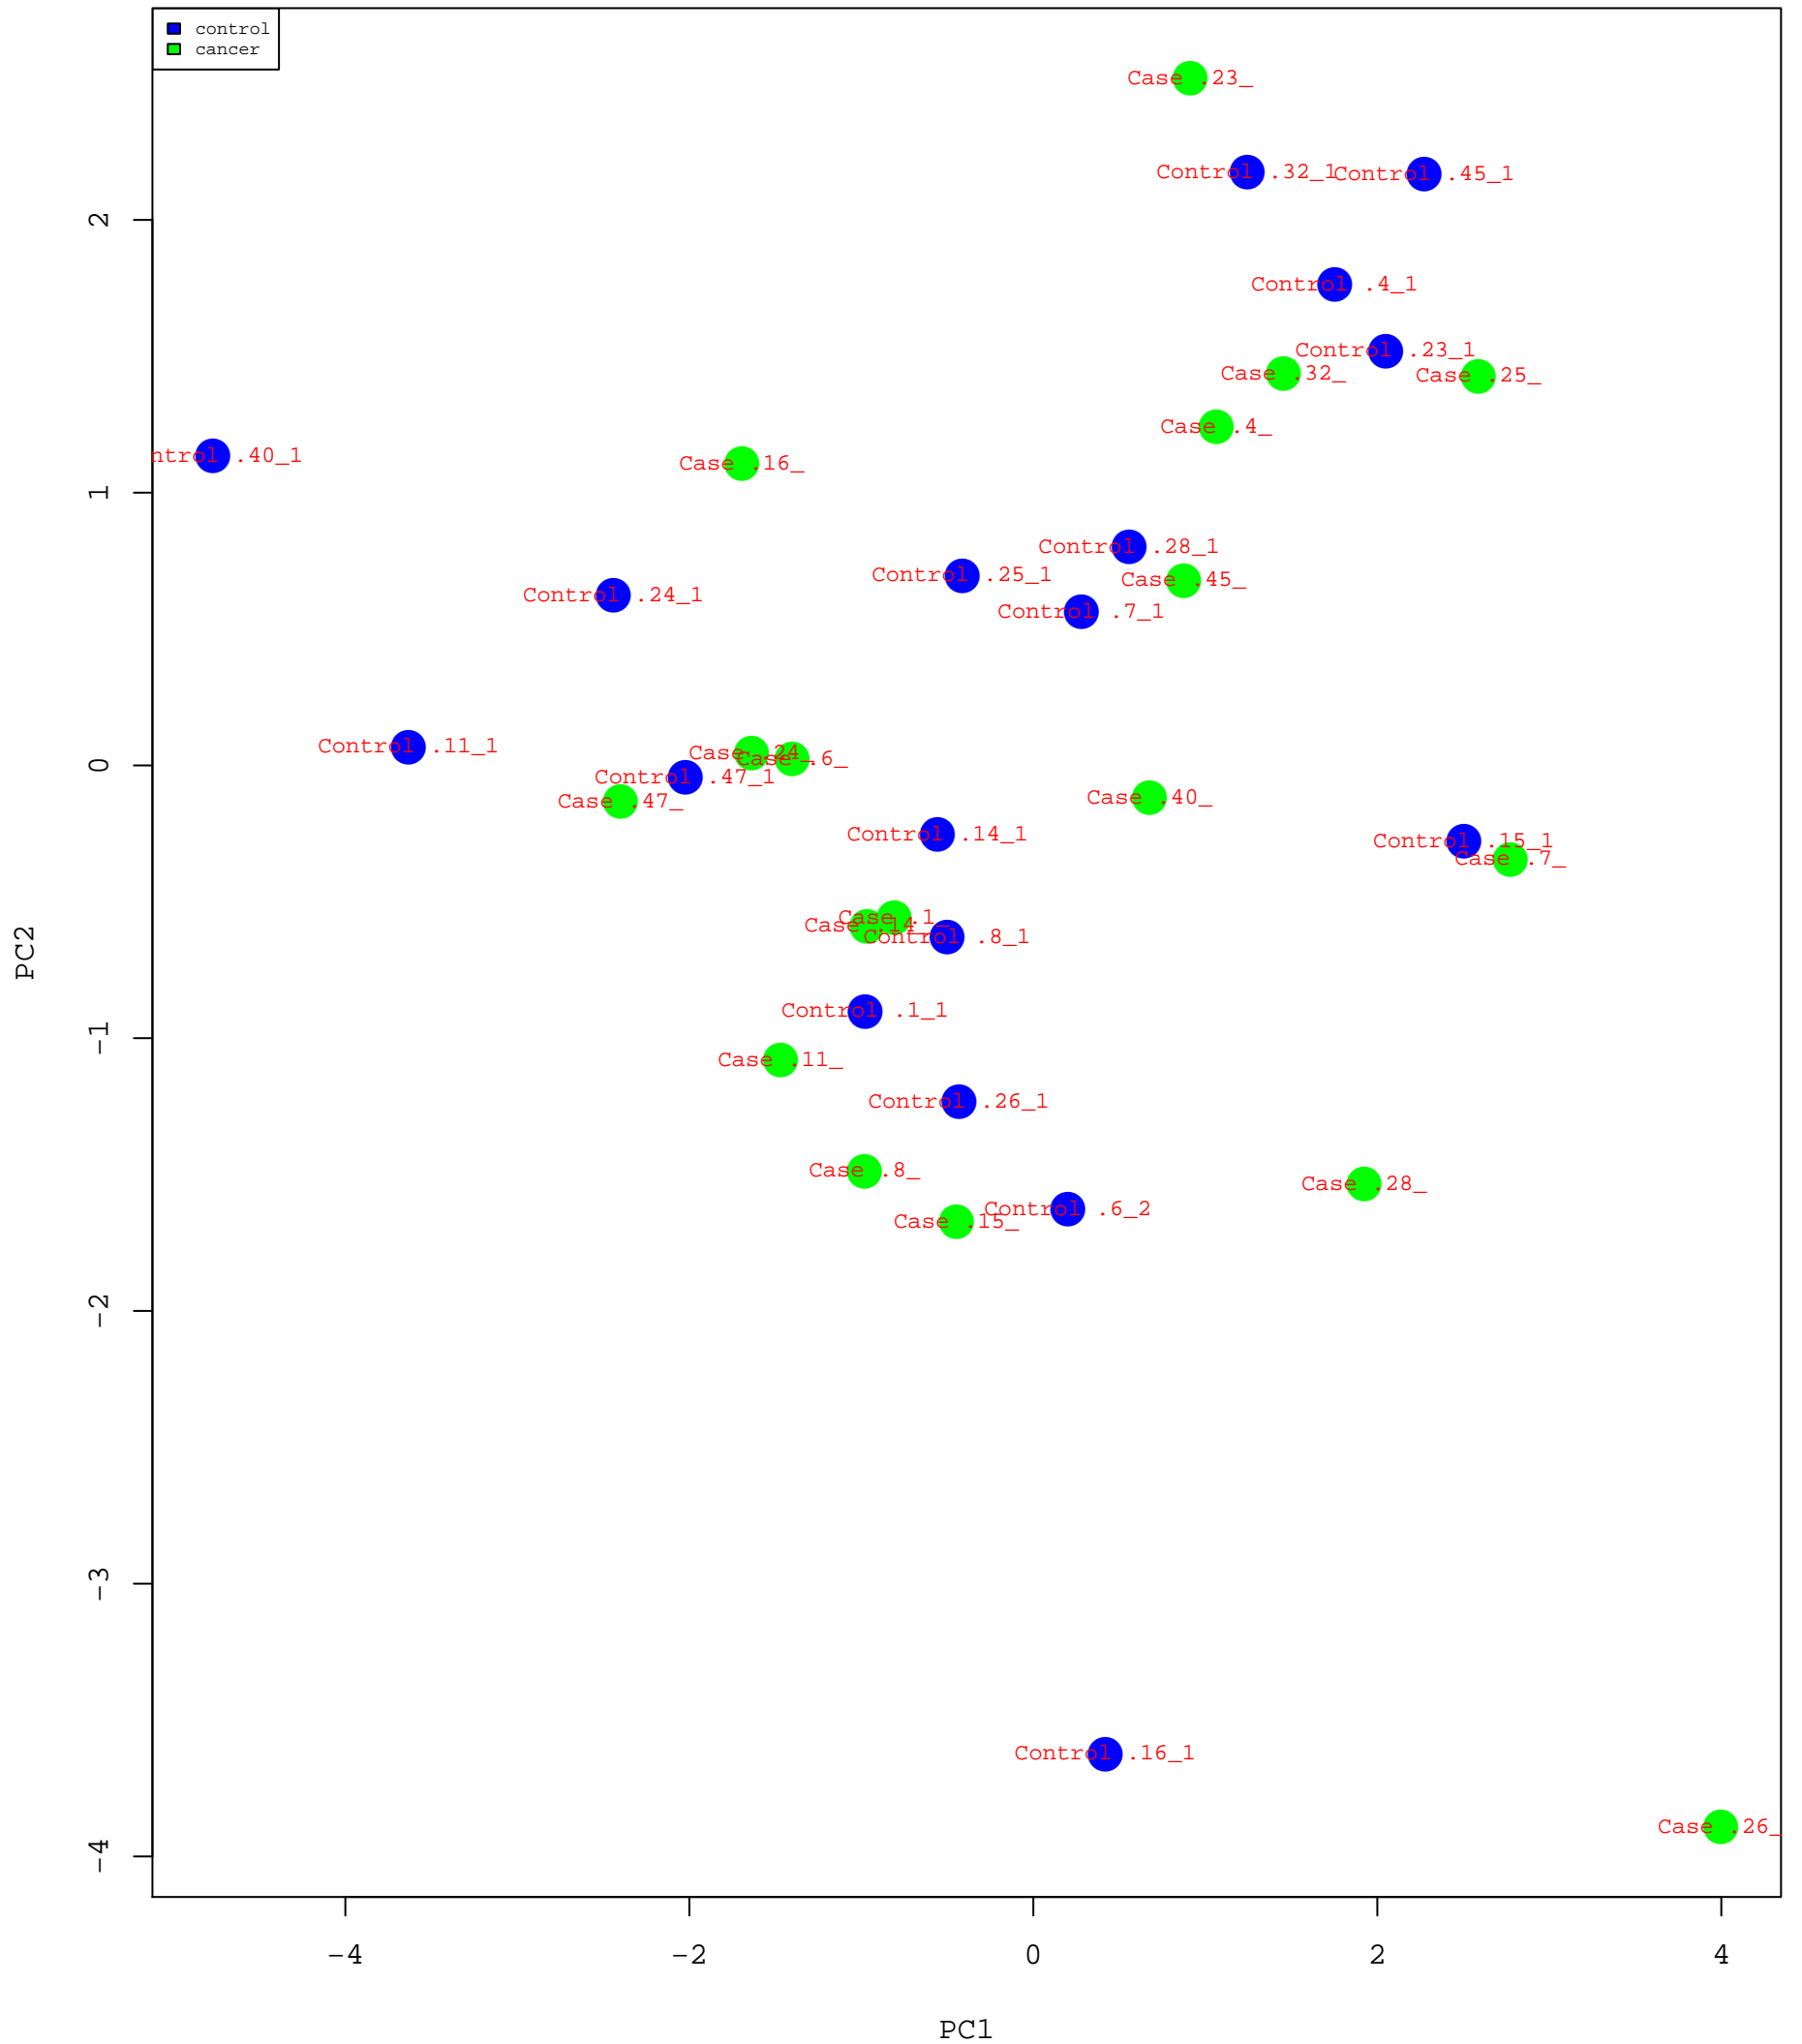

Supplement: NIHMS1520874-supplement-5.pdf [file NIHMS1520874-supplement-5.pdf]
